# Supplementary material
Source: PubMed Central journal article supplement (PMC7543031)
Supplement: 41560_2020_711_MOESM1_ESM.pdf [file 41560_2020_711_MOESM1_ESM.pdf]

---

**Supplementary information**

---

**Author Correction: Machine learning model to project the impact of COVID-19 on US motor gasoline demand**

---

In the format provided by the authors and unedited

Original

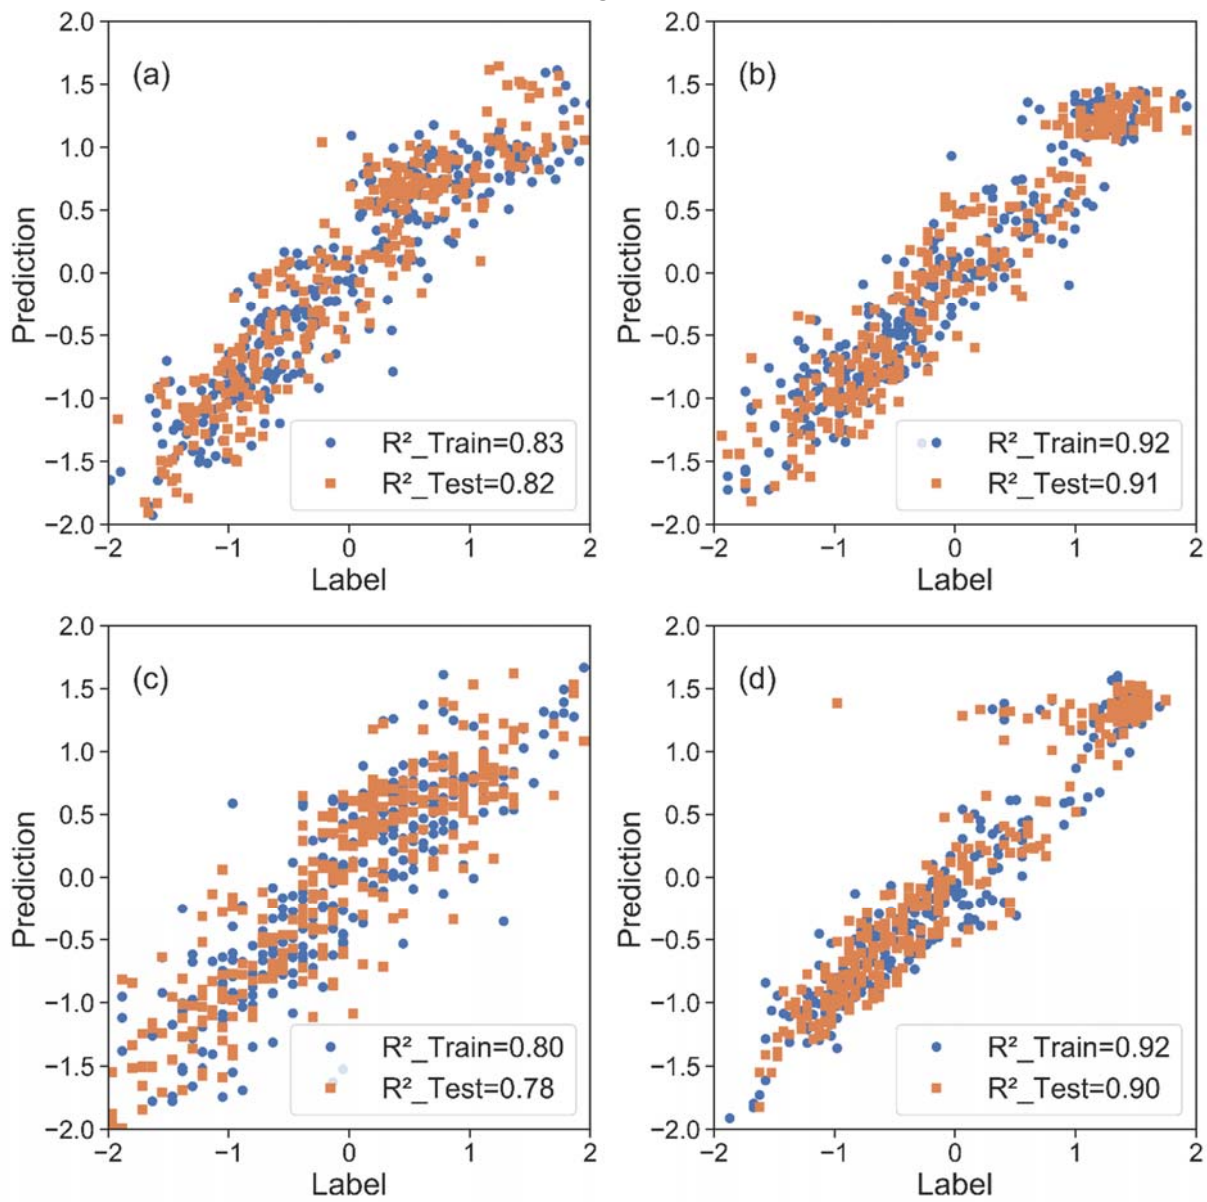

Supplementary Fig. 10 Original.

Corrected

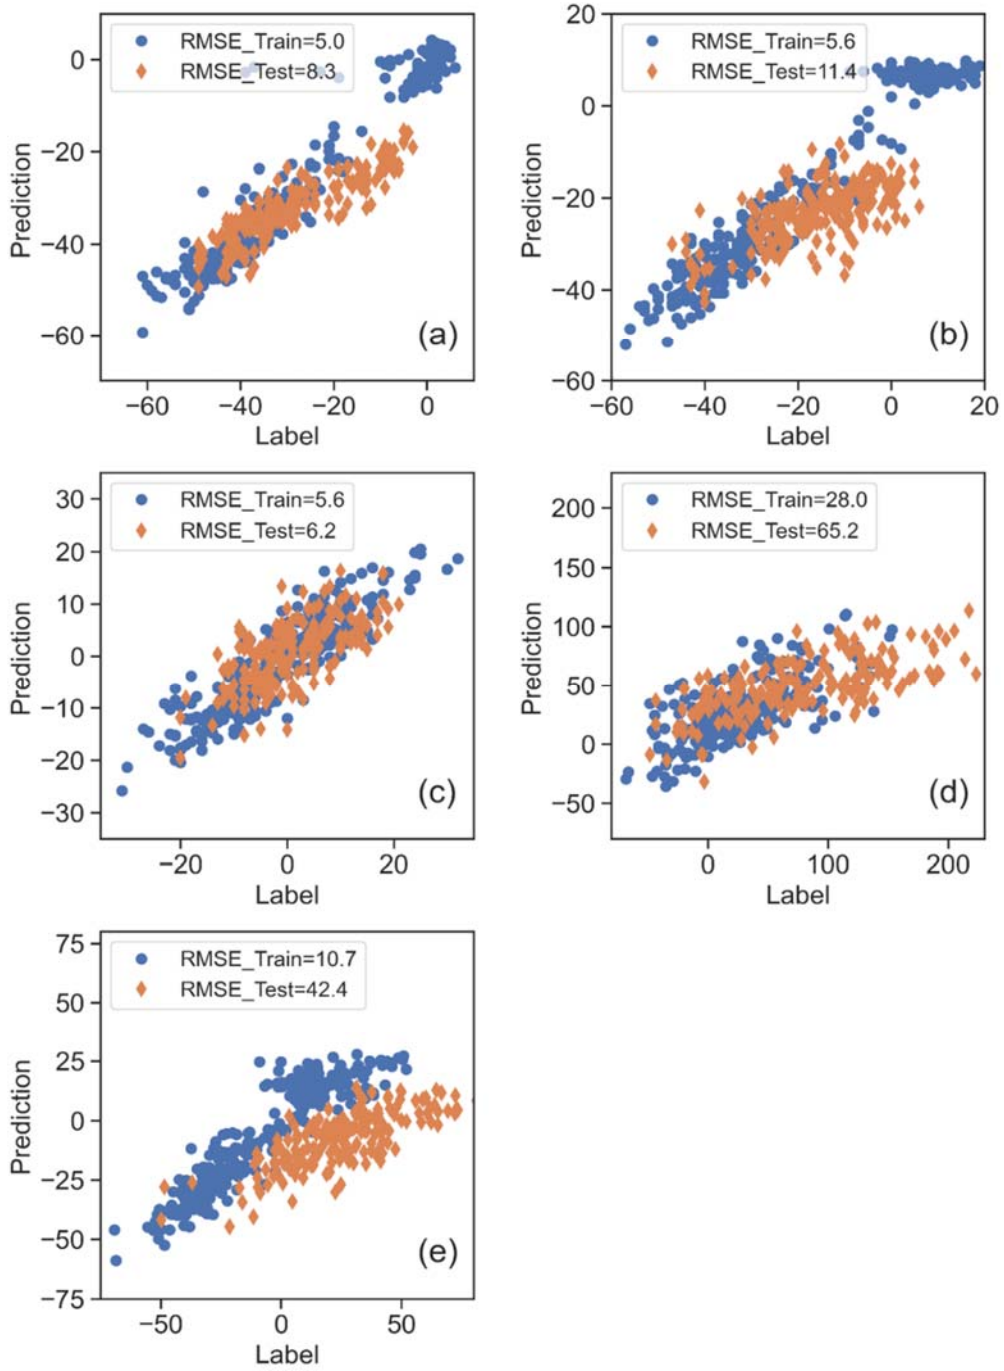

Supplementary Fig. 10 Corrected.

**Supplementary Table 4 Original**

| Layers   | Nodes     | Apple train R <sup>2</sup> | Apple test R <sup>2</sup> | Google train R <sup>2</sup> | Google test R <sup>2</sup> |
|----------|-----------|----------------------------|---------------------------|-----------------------------|----------------------------|
| 1        | 15        | 0.83                       | 0.81                      | 0.789                       | 0.758                      |
| 1        | 20        | 0.85                       | 0.83                      | 0.800                       | 0.772                      |
| 1        | 25        | 0.86                       | 0.84                      | 0.805                       | 0.777                      |
| 1        | 30        | 0.87                       | 0.85                      | 0.815                       | 0.786                      |
| 2        | 15        | 0.82                       | 0.80                      | 0.786                       | 0.763                      |
| 2        | 20        | 0.83                       | 0.82                      | 0.801                       | 0.774                      |
| <b>2</b> | <b>25</b> | <b>0.84</b>                | <b>0.82</b>               | <b>0.814</b>                | <b>0.789</b>               |
| 2        | 30        | 0.84                       | 0.82                      | 0.811                       | 0.780                      |
| 3        | 15        | 0.82                       | 0.81                      | 0.792                       | 0.768                      |
| 3        | 20        | 0.83                       | 0.81                      | 0.802                       | 0.773                      |
| 3        | 25        | 0.82                       | 0.80                      | 0.803                       | 0.769                      |
| 3        | 30        | 0.83                       | 0.81                      | 0.807                       | 0.771                      |
| 4        | 15        | 0.79                       | 0.78                      | 0.753                       | 0.725                      |
| 4        | 20        | 0.79                       | 0.77                      | 0.767                       | 0.742                      |
| 4        | 25        | 0.79                       | 0.78                      | 0.768                       | 0.739                      |
| 4        | 30        | 0.80                       | 0.78                      | 0.767                       | 0.737                      |

Supplementary Table 4 Corrected

|       |      |                  |                    | Google Mobility |            |                       |            |                      |            |       |            | Apple Mobility |            |
|-------|------|------------------|--------------------|-----------------|------------|-----------------------|------------|----------------------|------------|-------|------------|----------------|------------|
|       |      |                  |                    | Workplaces      |            | Retail and recreation |            | Grocery and pharmacy |            | Parks |            |                |            |
| Layer | Node | Training Dataset | Validation Dataset | Train           | Validation | Train                 | Validation | Train                | Validation | Train | Validation | Train          | Validation |
| 1     | 15   | Before April 15  | April 25-May 1     | 5.01            | 4.95       | 5.23                  | 10.60      | 5.81                 | 7.35       | 28.81 | 54.58      | 8.67           | 21.48      |
| 1     | 15   | Before April 29  | May 9- May 15      | 5.30            | 5.96       | 5.61                  | 11.37      | 5.82                 | 11.60      | 30.15 | 48.03      | 8.84           | 28.38      |
| 1     | 20   | Before April 15  | April 25-May 1     | 5.27            | 5.18       | 5.17                  | 10.96      | 5.77                 | 7.29       | 27.99 | 50.42      | 8.28           | 23.57      |
| 1     | 20   | Before April 29  | May 9- May 15      | 5.18            | 5.72       | 5.36                  | 11.78      | 5.64                 | 10.82      | 29.11 | 48.54      | 8.05           | 25.74      |
| 1     | 25   | Before April 15  | April 25-May 1     | 5.02            | 5.15       | 5.19                  | 11.91      | 5.71                 | 7.58       | 26.69 | 53.37      | 7.90           | 23.59      |
| 1     | 25   | Before April 29  | May 9- May 15      | 4.79            | 5.49       | 5.40                  | 11.32      | 5.59                 | 11.19      | 28.81 | 45.82      | 8.20           | 25.55      |
| 1     | 30   | Before April 15  | April 25-May 1     | 4.73            | 5.08       | 5.09                  | 10.57      | 5.58                 | 6.71       | 26.75 | 48.97      | 8.08           | 22.00      |
| 1     | 30   | Before April 29  | May 9- May 15      | 5.02            | 5.16       | 5.40                  | 11.34      | 5.61                 | 10.74      | 28.83 | 47.56      | 8.35           | 25.93      |
| 1     | 35   | Before April 15  | April 25-May 1     | 5.12            | 4.98       | 5.05                  | 10.99      | 5.66                 | 7.00       | 27.12 | 54.58      | 8.13           | 22.31      |
| 1     | 35   | Before April 29  | May 9- May 15      | 4.95            | 5.72       | 5.33                  | 11.00      | 5.61                 | 10.68      | 28.47 | 46.83      | 8.02           | 26.92      |
| 2     | 15   | Before April 15  | April 25-May 1     | 5.35            | 5.43       | 5.25                  | 11.24      | 5.70                 | 7.34       | 26.59 | 53.23      | 7.99           | 19.54      |
| 2     | 15   | Before April 29  | May 9- May 15      | 5.13            | 5.54       | 5.76                  | 11.65      | 5.80                 | 11.24      | 29.31 | 47.14      | 7.34           | 29.45      |
| 2     | 20   | Before April 15  | April 25-May 1     | 5.42            | 4.69       | 5.17                  | 11.05      | 5.58                 | 6.88       | 26.42 | 49.87      | 7.13           | 20.49      |
| 2     | 20   | Before April 29  | May 9- May 15      | 5.11            | 5.48       | 5.57                  | 11.78      | 5.63                 | 10.71      | 27.94 | 45.88      | 7.18           | 25.79      |
| 2     | 25   | Before April 15  | April 25-May 1     | 5.34            | 4.91       | 5.11                  | 11.39      | 5.76                 | 7.77       | 25.49 | 54.41      | 6.59           | 22.46      |
| 2     | 25   | Before April 29  | May 9- May 15      | 5.10            | 5.33       | 5.50                  | 11.18      | 5.58                 | 10.26      | 27.36 | 48.22      | 7.23           | 27.99      |
| 2     | 30   | Before April 15  | April 25-May 1     | 5.20            | 5.28       | 5.02                  | 10.59      | 5.58                 | 6.85       | 25.41 | 50.74      | 7.30           | 22.96      |
| 2     | 30   | Before April 29  | May 9- May 15      | 5.21            | 5.40       | 5.53                  | 11.19      | 5.54                 | 10.04      | 27.28 | 46.53      | 7.29           | 24.75      |
| 2     | 35   | Before April 15  | April 25-May 1     | 5.28            | 5.21       | 5.19                  | 11.86      | 5.64                 | 7.75       | 25.89 | 53.89      | 6.96           | 21.08      |
| 2     | 35   | Before April 29  | May 9- May 15      | 5.31            | 5.82       | 5.37                  | 12.00      | 5.39                 | 11.51      | 27.11 | 49.53      | 7.11           | 29.21      |
| 3     | 15   | Before April 15  | April 25-May 1     | 5.66            | 5.99       | 5.81                  | 11.37      | 5.68                 | 6.58       | 27.15 | 51.62      | 7.02           | 21.66      |
| 3     | 15   | Before April 29  | May 9- May 15      | 6.45            | 7.92       | 6.01                  | 12.68      | 5.86                 | 10.28      | 28.15 | 45.36      | 7.28           | 26.75      |
| 3     | 20   | Before April 15  | April 25-May 1     | 5.49            | 5.43       | 5.04                  | 11.25      | 5.51                 | 7.33       | 25.16 | 55.06      | 6.63           | 22.00      |

|   |    |                 |                |      |      |      |       |      |       |       |       |      |       |
|---|----|-----------------|----------------|------|------|------|-------|------|-------|-------|-------|------|-------|
| 3 | 20 | Before April 29 | May 9- May 15  | 5.42 | 6.04 | 5.76 | 12.18 | 5.69 | 11.81 | 27.33 | 49.98 | 6.82 | 24.47 |
| 3 | 25 | Before April 15 | April 25-May 1 | 5.38 | 4.95 | 5.30 | 11.55 | 5.58 | 7.31  | 25.18 | 58.46 | 6.38 | 22.85 |
| 3 | 25 | Before April 29 | May 9- May 15  | 5.31 | 6.20 | 5.63 | 11.36 | 5.72 | 10.64 | 27.01 | 44.76 | 6.84 | 25.93 |
| 3 | 30 | Before April 15 | April 25-May 1 | 5.76 | 6.29 | 5.70 | 11.96 | 5.64 | 7.18  | 24.99 | 52.88 | 7.28 | 18.55 |
| 3 | 30 | Before April 29 | May 9- May 15  | 5.30 | 5.80 | 5.45 | 11.67 | 5.41 | 10.68 | 25.32 | 47.79 | 6.59 | 25.22 |
| 3 | 35 | Before April 15 | April 25-May 1 | 5.19 | 4.89 | 5.25 | 11.91 | 5.66 | 7.42  | 24.76 | 55.43 | 6.57 | 19.79 |
| 3 | 35 | Before April 29 | May 9- May 15  | 5.17 | 6.02 | 5.32 | 11.66 | 5.34 | 10.61 | 26.17 | 44.64 | 6.97 | 26.16 |
| 4 | 15 | Before April 15 | April 25-May 1 | 5.64 | 5.58 | 5.93 | 12.63 | 5.69 | 7.34  | 30.97 | 55.07 | 7.13 | 20.27 |
| 4 | 15 | Before April 29 | May 9- May 15  | 6.48 | 8.62 | 6.20 | 13.05 | 6.12 | 11.26 | 30.78 | 45.05 | 7.81 | 24.87 |
| 4 | 20 | Before April 15 | April 25-May 1 | 5.96 | 6.52 | 5.91 | 12.08 | 5.72 | 6.75  | 31.39 | 55.03 | 6.44 | 21.84 |
| 4 | 20 | Before April 29 | May 9- May 15  | 6.81 | 8.70 | 6.20 | 13.79 | 5.75 | 11.52 | 28.69 | 42.14 | 6.75 | 25.54 |
| 4 | 25 | Before April 15 | April 25-May 1 | 6.34 | 6.80 | 5.82 | 12.67 | 6.06 | 7.68  | 26.12 | 53.47 | 6.72 | 19.45 |
| 4 | 25 | Before April 29 | May 9- May 15  | 6.27 | 8.13 | 6.39 | 13.86 | 5.88 | 11.42 | 27.79 | 40.81 | 7.06 | 26.97 |
| 4 | 30 | Before April 15 | April 25-May 1 | 6.58 | 7.76 | 6.02 | 9.86  | 5.91 | 5.91  | 31.55 | 53.28 | 6.70 | 22.69 |
| 4 | 30 | Before April 29 | May 9- May 15  | 6.58 | 7.96 | 6.08 | 12.59 | 5.62 | 10.64 | 28.01 | 43.04 | 6.38 | 25.16 |
| 4 | 35 | Before April 15 | April 25-May 1 | 6.44 | 7.53 | 5.75 | 10.98 | 5.83 | 7.26  | 31.18 | 53.50 | 6.58 | 22.72 |
| 4 | 35 | Before April 29 | May 9- May 15  | 6.37 | 7.92 | 6.26 | 13.14 | 5.73 | 11.00 | 26.42 | 42.12 | 7.38 | 26.22 |
